# Supplementary material
Source: MDPI journal article supplement (https://www.mdpi.com/1424-2818/13/7/317)

# **Effects of continuous cropping of *Codonopsis tangshen* on soil bacterial community as determined by pyrosequencing**

Yan Xie <sup>2 †</sup>, Meide Zhang <sup>1 †</sup>, Yinsheng He <sup>1 \*</sup>, Wuxian Zhou <sup>1</sup>, Lunqiang Ai <sup>1</sup>, Haihua

Liu <sup>1</sup>, Liang Chen <sup>2 \*</sup>

**Supplementary Table 1** The relative abundances (%) of the bacteria at the Phylum level

|                         | <b>FLZ1</b> | <b>LZ1</b> | <b>FLZ2</b> | <b>LZ2</b> | <b>FLZ3</b> | <b>LZ3</b> |
|-------------------------|-------------|------------|-------------|------------|-------------|------------|
| <i>Proteobacteria</i>   | 41.38       | 39.56      | 41.42       | 41.50      | 37.85       | 34.55      |
| <i>Acidobacteria</i>    | 15.75       | 21.14      | 16.52       | 23.80      | 19.33       | 25.49      |
| <i>Gemmatimonadetes</i> | 7.89        | 8.66       | 6.48        | 6.84       | 12.50       | 13.08      |
| <i>Chloroflexi</i>      | 10.57       | 5.27       | 10.42       | 5.23       | 10.11       | 7.39       |
| <i>Actinobacteria</i>   | 8.00        | 7.80       | 8.31        | 7.23       | 3.77        | 7.83       |
| <i>Bacteroidetes</i>    | 4.67        | 4.62       | 5.02        | 3.49       | 4.31        | 1.70       |
| <i>Nitrospirae</i>      | 4.27        | 1.56       | 4.78        | 1.10       | 5.21        | 1.16       |
| <i>Verrucomicrobia</i>  | 1.51        | 2.89       | 0.96        | 0.98       | 0.94        | 0.63       |
| <i>Planctomycetes</i>   | 2.03        | 0.73       | 1.57        | 0.87       | 1.85        | 0.67       |
| <i>TM7</i>              | 0.28        | 0.75       | 0.48        | 2.43       | 0.20        | 2.24       |
| <i>WS3</i>              | 1.70        | 0.42       | 1.18        | 0.07       | 1.94        | 0.08       |
| <i>AD3</i>              | 0.01        | 1.05       | 0.01        | 2.04       | 0.01        | 2.00       |
| <b>Others</b>           | 1.93        | 5.56       | 2.85        | 4.41       | 1.99        | 3.20       |

LZ1, FLZ, LZ2, FLZ2, LZ3 and FLZ3 represent the soil samples collected from continuous cropping (LZ) and main crops (FLZ) at the May 4th (LZ1 and FLZ1), July 14th (LZ2 and FLZ2) and September 19th (LZ3 and FLZ3), 2016.

**Supplementary Table 2** The relative abundances (%) of the bacteria at the class level

|                            | <b>FLZ1</b> | <b>LZ1</b> | <b>FLZ2</b> | <b>LZ2</b> | <b>FLZ3</b> | <b>LZ3</b> |
|----------------------------|-------------|------------|-------------|------------|-------------|------------|
| <i>Alphaproteobacteria</i> | 16.05       | 19.62      | 21.78       | 29.29      | 16.93       | 16.05      |
| <i>Betaproteobacteria</i>  | 10.38       | 7.91       | 7.24        | 2.90       | 9.67        | 10.38      |
| <i>Gammaproteobacteria</i> | 6.05        | 8.09       | 4.68        | 5.67       | 4.33        | 6.05       |
| <i>Deltaproteobacteria</i> | 8.79        | 3.94       | 7.57        | 3.63       | 6.85        | 8.79       |
| <i>Gemm-1</i>              | 4.04        | 3.77       | 3.75        | 4.47       | 6.29        | 4.04       |
| <i>Acidobacteria-6</i>     | 9.56        | 1.46       | 9.12        | 0.89       | 8.07        | 9.56       |
| <i>Acidobacteriia</i>      | 0.25        | 7.79       | 0.39        | 9.00       | 1.33        | 0.25       |
| <i>Gemmatimonadetes</i>    | 3.40        | 4.87       | 2.52        | 2.35       | 5.87        | 3.40       |
| <i>Actinobacteria</i>      | 4.28        | 4.27       | 5.52        | 4.73       | 1.25        | 4.28       |
| <i>Solibacteres</i>        | 0.89        | 5.19       | 1.57        | 4.60       | 2.68        | 0.89       |
| <i>Anaerolineae</i>        | 6.07        | 1.25       | 5.33        | 0.41       | 5.46        | 6.07       |
| <i>DA052</i>               | 0.03        | 4.36       | 0.11        | 7.66       | 0.20        | 0.03       |
| <i>Nitrospira</i>          | 4.27        | 1.56       | 4.78        | 1.10       | 5.19        | 4.27       |
| <i>Acidimicrobiia</i>      | 1.70        | 1.27       | 1.70        | 1.19       | 1.58        | 1.70       |
| <i>Saprospirae</i>         | 1.97        | 1.46       | 2.26        | 1.24       | 2.46        | 1.97       |
| <i>Thermoleophilia</i>     | 1.78        | 2.24       | 0.96        | 1.30       | 0.88        | 1.78       |
| <i>Ellin6529</i>           | 1.86        | 0.63       | 2.26        | 0.57       | 2.63        | 1.86       |
| <i>Ktedonobacteria</i>     | 0.04        | 2.11       | 0.02        | 2.91       | 0.09        | 0.04       |
| <i>Chloracidobacteria</i>  | 1.66        | 0.46       | 1.74        | 0.37       | 3.12        | 1.66       |
| <i>Sphingobacteriia</i>    | 0.54        | 2.24       | 0.70        | 1.51       | 0.41        | 0.54       |
| <b>Others</b>              | 16.38       | 15.53      | 16.00       | 14.21      | 14.69       | 16.38      |

LZ1, FLZ, LZ2, FLZ2, LZ3 and FLZ3 represent the soil samples collected from continuous cropping (LZ) and main crops (FLZ) at the May 4th (LZ1 and FLZ1), July 14th (LZ2 and FLZ2) and September 19th (LZ3 and FLZ3), 2016.

**Supplementary Table 3** The relative abundances (%) of the bacteria at the genus level

|                              | <b>FLZ1</b> | <b>LZ1</b> | <b>FLZ2</b> | <b>LZ2</b> | <b>FLZ3</b> | <b>LZ3</b> |
|------------------------------|-------------|------------|-------------|------------|-------------|------------|
| <i>Rhodoplanes</i>           | 3.16        | 2.64       | 4.52        | 2.49       | 2.04        | 1.56       |
| <i>Candidatus Koribacter</i> | 0.15        | 3.13       | 0.17        | 4.48       | 0.57        | 3.16       |
| <i>Candidatus Solibacter</i> | 0.42        | 2.69       | 0.87        | 2.13       | 1.46        | 3.82       |
| <i>Rhodanobacter</i>         | 0.64        | 3.42       | 0.25        | 1.84       | 0.54        | 4.03       |
| <i>Nitrospira</i>            | 2.19        | 1.11       | 2.71        | 1.07       | 2.41        | 1.02       |
| <i>Sphingobium</i>           | 1.16        | 1.19       | 1.36        | 0.71       | 2.52        | 1.98       |
| <i>Rhodococcus</i>           | 0.02        | 0.09       | 1.54        | 1.11       | 0.23        | 0.02       |
| <b>Unclassified genus</b>    | 80.41       | 74.86      | 76.20       | 79.09      | 83.80       | 81.17      |
| <b>Others</b>                | 11.85       | 10.87      | 12.38       | 7.09       | 6.43        | 3.24       |

LZ1, FLZ, LZ2, FLZ2, LZ3 and FLZ3 represent the soil samples collected from continuous cropping (LZ) and main crops (FLZ) at the May 4th (LZ1 and FLZ1), July 14th (LZ2 and FLZ2) and September 19th (LZ3 and FLZ3), 2016.

## Supplementary Figure 1 Sampling plan design drawing

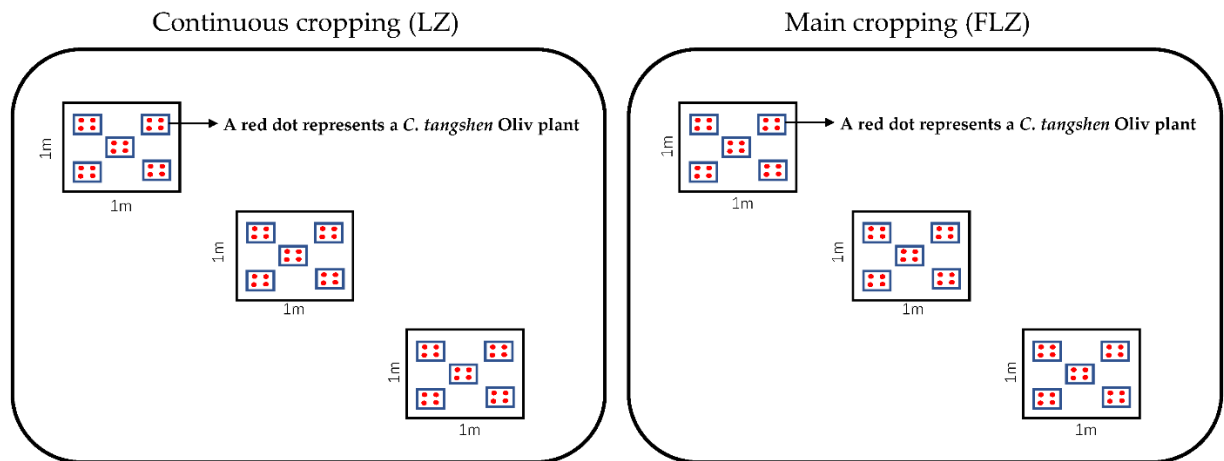

Supplement: s1 [file s1]
